# Supplementary material
Source: Elsevier journal article supplement (https://www.sciencedirect.com/science/article/pii/S1699258X1630047X)
Supplement: mmc1 [file S1699258X1630047X:mmc1.pdf]

**Anexo I. Antibióticos en el embarazo** (tomado de Vallano A., Arnau JM et al. Enferm Infecc Microbiol Clin. 2009;27(9):536–542)

| Grupos de antimicrobianos                                       | Categorías de riesgo de los antimicrobianos según la clasificación de FDA |                            |                     |                |                  |
|-----------------------------------------------------------------|---------------------------------------------------------------------------|----------------------------|---------------------|----------------|------------------|
|                                                                 | A                                                                         | B                          | C                   | D              | X                |
| <b>Aminoglucósidos</b>                                          |                                                                           |                            | Amikacina           | Tobramicina    | Estreptomicina   |
|                                                                 |                                                                           |                            | Gentamicina         | Neomicina      | Kanamicina       |
| <b>Antituberculosos</b>                                         | Etambutol                                                                 |                            | Etionamida          | Pirazinamida   |                  |
|                                                                 |                                                                           |                            | Isoniazida          | Rifampicina    |                  |
|                                                                 | Rifabutin                                                                 |                            | PAS                 |                |                  |
| <b>Carbapenems</b>                                              | Doripenem                                                                 |                            | Imipenem- cistatina |                |                  |
|                                                                 | Ertapenem                                                                 |                            |                     |                |                  |
|                                                                 | Meropenem                                                                 |                            |                     |                |                  |
| <b>Cefalosporinas</b>                                           | Cefazolina                                                                | Cefixima                   |                     |                |                  |
|                                                                 | Cefalexina                                                                | Ceftriaxona                |                     |                |                  |
|                                                                 | Cefaclor                                                                  | Cefotaxima                 |                     |                |                  |
|                                                                 | Cefuroxima                                                                | Ceftazidima                |                     |                |                  |
|                                                                 | Cefonicid                                                                 | Cefepima                   |                     |                |                  |
|                                                                 | Cefoxitina                                                                |                            |                     |                |                  |
| <b>Macrólidos y lincosamidas</b>                                | Azitromicina                                                              | Eritromicina               | Claritromicina      | Espiramicina   |                  |
|                                                                 | Clindamicina                                                              |                            | Diritromicina       | Telitromicina  |                  |
| <b>Penicilinas, monobactams e inhibidores de betalactamasas</b> | Aztreonam                                                                 | Penicilina V               |                     |                |                  |
|                                                                 | Ácido clavulánico                                                         | Piperacilina               |                     |                |                  |
|                                                                 | Amoxicilina                                                               | Tazobactam                 |                     |                |                  |
|                                                                 | Cloxacilina                                                               | Sulbactam                  |                     |                |                  |
|                                                                 | Penicilina G                                                              |                            |                     |                |                  |
| <b>Quinolonas</b>                                               |                                                                           |                            | Ciprofloxacina      | Ofloxacina     |                  |
|                                                                 |                                                                           |                            | Levofloxacina       | Moxifloxacina  |                  |
|                                                                 |                                                                           |                            | Norfloxacina        |                |                  |
| <b>Sulfonas, sulfonamidas y trimetoprim</b>                     |                                                                           |                            | Dapsona             | Sulfametoxazol |                  |
|                                                                 |                                                                           |                            | Sulfadiacina        | Trimetoprim    |                  |
|                                                                 |                                                                           |                            | Sulfadoxina         |                |                  |
| <b>Tetraciclinas</b>                                            |                                                                           |                            |                     |                | Clortetraciclina |
|                                                                 |                                                                           |                            |                     |                | Doxiciclina      |
| <b>Otros antibióticos</b>                                       | Fosfomicina                                                               | Polimixina                 | Bacitracina         | Colistemetato  |                  |
|                                                                 | Metronidazol                                                              | Qinupristina/dalfopristina | Cloramfenicol       | Furazolidona   |                  |
|                                                                 | Nitrofurantoína                                                           |                            | Linezolid           |                |                  |
| <b>Antifúngicos</b>                                             | Anfotericina B                                                            | Clotrimazol                | Caspofungina        | Itraconazol    | Voriconazol      |
|                                                                 |                                                                           |                            | Econazol            | Ketoconazol    |                  |
|                                                                 |                                                                           |                            | Fluconazol          | Miconazol      |                  |
|                                                                 |                                                                           |                            | Griseofulvina       | Nistatina      |                  |
| <b>Antimaláricos</b>                                            | Ciclopirox                                                                | Terbibafina                | Atovaquona          | Primaquina     | Quinina          |
|                                                                 | Proguanil                                                                 |                            | Cloroquina          | Quinacrina     |                  |

|                               |               |              |             |                |
|-------------------------------|---------------|--------------|-------------|----------------|
| <b>Otros antiparasitarios</b> | Permetrina    | Piretrinas   | Mefloquina  | Quinidina      |
|                               | Lindano       | Praziquantel | Albendazol  | Mebendazol     |
|                               | Piperazina    |              | Ivermectina | Pentamidina    |
| <b>Antirretrovirales</b>      | Atazanavir    | Nelfinavir   | Abacavir    | Lamivudina     |
|                               |               |              | Adenofovir  | Lopinavir      |
|                               | Darunavir     | Ritonavir    | Amprenavir  | Nevirapina     |
|                               |               |              | Cidofovir   | Zidovudina     |
|                               | Didanosina    | Saquinavir   | Efavirenz   | Indinavir      |
|                               |               | Estavudina   |             |                |
| <b>Otros Antivirales</b>      | Emtricitabina | Tenofovir    |             |                |
|                               | Aciclovir     | Valaciclovir | Amantadina  | Oseltamivir    |
|                               | Famciclovir   |              | Foscarnet   | Rivabirina     |
|                               |               |              | Ganciclovir | Rimantadina    |
|                               |               |              | Vidarabina  | Valganciclovir |
|                               |               |              | Zanamivir   |                |

| Seguridad fármacos en embarazo. Clasificación de la Food and Drug Administration (FDA) |                                                                                              |                                                                                                                                                                                                                            |
|----------------------------------------------------------------------------------------|----------------------------------------------------------------------------------------------|----------------------------------------------------------------------------------------------------------------------------------------------------------------------------------------------------------------------------|
| CATEGORIA                                                                              | SEGURIDAD                                                                                    | DESCRIPCIÓN                                                                                                                                                                                                                |
| A                                                                                      | Estudios controlados no han demostrado riesgo. Riesgo remoto de daño fetal                   | Estudios en embarazadas no han evidenciado riesgo para el feto durante el primer trimestre de gestación ni existen evidencias durante el resto del embarazo                                                                |
| B                                                                                      | No hay descritos riesgos en humanos. Se acepta su uso durante el embarazo                    | Estudios en animales no han evidenciado riesgo pero no existen estudios adecuados en embarazadas, o existen estudios en animales en los que se detectan efectos adversos pero estos no han sido confirmados en embarazadas |
| C                                                                                      | No puede descartarse riesgo fetal. Su utilización debe realizarse valorando beneficio/riesgo | Estudios en animales han demostrado efectos adversos pero no existen estudios en embarazadas, o no se dispone de estudios ni en embarazadas ni en animales                                                                 |
| D                                                                                      | Existen indicios de riesgo fetal. Usarse solo en casos de no existencia de alternativas      | Estudios en embarazadas han demostrado el riesgo de efectos adversos, pero existen ocasiones en las que los beneficios pueden superar estos riesgos                                                                        |
| X                                                                                      | Contraindicados en el embarazo                                                               | Estudios en embarazadas y en animales han demostrado que los riesgos potenciales superan claramente a los posibles beneficios                                                                                              |

### Factores de Riesgo de Preeclampsia

|                                                                                       |
|---------------------------------------------------------------------------------------|
| <b>Edad &gt; 40 años</b>                                                              |
| Antecedentes familiares de pre-eclampsia                                              |
| Antecedentes personales de pre-eclampsia, embarazos múltiples, nuliparidad o diabetes |
| Obesidad o hipertensión arterial al inicio del embarazo                               |
| LES activo                                                                            |
| Antecedentes de nefritis lúpica de clase III o IV                                     |
| Presencia de anticuerpos antifosfolípidos                                             |

**Tabla.** Métodos contraceptivos y su eficacia.

| Método                                              | Fallos con uso correcto | Comentario                                                                            |
|-----------------------------------------------------|-------------------------|---------------------------------------------------------------------------------------|
| Contracepción hormonal (estrógenos + progestágenos) |                         | -Parejas estables<br>-Contraindicado en mujeres con SAF, HTA no controlada, IRC grave |
| Anticonceptivos orales con 15-35 ml de estrógenos   | 0,3%-8%                 |                                                                                       |
| Parche hormonal                                     | 0,3%-8%                 |                                                                                       |
| Anillo vaginal                                      | 0,3%-8%                 |                                                                                       |
| Progestágenos solos                                 |                         | -Parejas estables                                                                     |
| Orales                                              | 0,5%-8%                 |                                                                                       |
| Implante                                            | 0,1%                    |                                                                                       |
| Inyección medroxiprogesterona                       | 0,3%                    |                                                                                       |
| Píldora del día después (levonorgestrel)            | 2%-3%                   | -En caso de emergencia                                                                |
| Dispositivos intrauterinos (cobre, levonorgestrel)  | 0,1%-0,8%               | -Pareja estable                                                                       |
| Métodos de barrera (preservativos, diafragma)       | 2%-20%                  | -Parejas esporádicas<br>-Asociar espermicida                                          |

**Abreviaturas:** SAF=síndrome antifosfolípido; HTA=hipertensión arterial; IRC=insuficiencia renal crónica.
